# Supplementary material for: A tentative discussion on the monitoring of water resources in China
Source: Copernicus journal article supplement (doi:10.5194/piahs-374-85-2016), 2016-10-17
Supplement: Supplementary file 1 [file Copy of Directory of rivers to be carried out for water allocation(monitoringassessment) 2010-2015.xls]

## Sheet: Sheet1
Directory of rivers to be carried out for water allocation (monitoring and assessment) during the period of 2010-2015
No.	Water committee	river	area（km2）
一	2010-2012		1710685
1	Songliao river committee	nengjiang river	298500
2		second Songhua river	73416
3		east laohe river	10364
4		lalin river	19923
5	Haihe river committee	jiyun river	10288
6		juma river	10154
7		zhuozhang river	11206
8	Yellow river committee	datong river	15130
9		weding river	30261
10		weihe river	62500
11		jinghe river	45400
12	Huaihe river committee	huaihe river	187000
13		yihe river	11392
14		shuhe river	5970
15	Taihu lake committee	taihu lake	36895
16	Yangtze river committee	hanjiang river	154804
17		jialinjiang river	159357
18		tuohe river	27631
19		chishui river	19231
20		mingjiang river	135411
21	Pearl river committee	beipanjiang river	26590
22		beijiang river	46710
23		dongjiang river	35340
24		hanjiang river	30112
25		huangnihe river	8264
二	2013-2015		1593783
26	Songliao river committee	songhuajiang river	262704
27		taoer river	43443
28		zhuoer river	17736
29		liaohe river	221100
30		nuoming river	27983
31		yalu river	19798
32		mudanjiang river	38909
33		xiliao river	135193
34		liuhe river	7554
35	Haihe river committee	luanhe river	54530
36		chaobai river	17595
37		beiyun river	6166
38		futu river	24774
39		weihe river	15142
40	Yellow river committee	taohe river	25527
41		yiluo river	18881
42		qinhe river	13532
43		beiluo river	26900
44	Huaihe river committee	hongru river	12380
45		shaying river	36728
46		wohe river	15905
47		shiguan river	6889
48	Taihu lake committee	xinganjiang river	12151
49	Yangtze river committee	jingshajiang river	258432
50		niulanjiang river	13440
51		wujiang river	87879
52	Pearl river committee	xijiang river	353120
53		liuhe river	58228
Total			3304468
