# Supplementary material for: A tentative discussion on the monitoring of water resources in China
Source: Copernicus journal article supplement (doi:10.5194/piahs-374-85-2016), 2016-10-17
Supplement: Supplementary file 1 [file piahs-374-85-2016-supplement.zip]

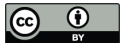

## *Supplement of*

# **A tentative discussion on the monitoring of water resources in China**

**Yang Jianqing et al.**

*Correspondence to:* Yang Jianqing (jianqing.yang@mwr.gov.cn)

- piahs-374-85-2016-supplement-title-page.pdf
- Copy of Directory of rivers to be carried out for water allocation(monitringassessment) 2010-2015.xls

The copyright of individual parts of the supplement might differ from the CC-BY 3.0 licence.
